# Supplementary material for: Versatile vector suite for the extracytoplasmic production and purification of heterologous His-tagged proteins in Lactococcus lactis
Source: PubMed Central journal article supplement (PMC4619460; doi:10.1007/s00253-015-6778-8), 2015-07-10
Supplement: 253_2015_6778_MOESM1_ESM.pdf [file 253_2015_6778_MOESM1_ESM.pdf]

**Supplementary material submitted to “Applied Microbiology and Biotechnology” for:**

Versatile vector suite for the extracytoplasmic production and purification of heterologous His-tagged proteins in *Lactococcus lactis*

Jolanda Neef<sup>1</sup>, Fin J. Milder<sup>2</sup>, Danny G.A.M. Koedijk<sup>1</sup>, Marindy Klaassens<sup>1</sup>,  
Erik C. Heezius<sup>2</sup>, Jos A.G. van Strijp<sup>2</sup>, Andreas Otto<sup>3</sup>, Dörte Becher<sup>3</sup>,  
Jan Maarten van Dijl<sup>1</sup>, and Girbe Buist<sup>1#</sup>

<sup>1</sup> Department of Medical Microbiology, University of Groningen, University Medical Center Groningen, Hanzeplein 1, P.O. Box 30001, 9700 RB Groningen, The Netherlands

<sup>2</sup> Department of Medical Microbiology, University Medical Center Utrecht, PO G04.614, Heidelberglaan 100, 3584 CX Utrecht, The Netherlands

<sup>3</sup> Institut für Mikrobiologie, Ernst-Moritz-Arndt Universität Greifswald, Friedrich-Ludwig-Jahn-Str. 15, D-17489 Greifswald, Germany

**#Corresponding author:** Girbe Buist, Department of Medical Microbiology, University Medical Center Groningen, Hanzeplein 1, P.O. Box 30001, 9700 RB Groningen, the Netherlands. Phone: +31-50-3615190; Fax: +31-50-3619105; E-mail: g.buist@umcg.nl

**Table S1: Primers used in this study**

| <b>Primer</b> | <b>5' → 3' Nucleotide sequence<sup>a</sup></b>            | <b>Restriction site</b> |
|---------------|-----------------------------------------------------------|-------------------------|
| SA0620.f      | ATAT <u>GGATCC</u> ATGGGATCTACACAACATACAGTACAATCTGG       | <i>Bam</i> HI           |
| SA0620.r1     | ATATGCGGCCGCTCGAATTCCATGGATGAATGCATAGC                    | <i>Not</i> I            |
| SA0620.r2     | ATATGCGGCCGCTTATCGAATTCCATGGATGAATGCATAGC                 | <i>Not</i> I            |
| FtsL.f        | ATATGGATCCAAAATGGATGCGTATGATACGCG                         | <i>Bam</i> HI           |
| FtsL.r1       | ATATGCGGCCGCAATTTTTGCTTCGCCATTACTAC                       | <i>Not</i> I            |
| FtsL.r2       | ATATGCGGCCGCTTAATTTTTGCTTCGCCATTACTACGC                   | <i>Not</i> I            |
| ClfB.f        | ATATGGATCCTCAGAACAATCGAACGATACAACGC                       | <i>Bam</i> HI           |
| ClfB.r1       | ATATGCGGCCGCGTCTGGGCTTGGTTCCGGTTC                         | <i>Not</i> I            |
| ClfB.r2       | ATATGCGGCCGCTTAGTCTGGGCTTGGTTCCGGTTC                      | <i>Not</i> I            |
| SA2100.f      | ATATGGATCCTCTGAGCAAGATAACTACGGTTATAATCC                   | <i>Bam</i> HI           |
| SA2100.r1     | ATATGCGGCCGCGTGAATGAAGTTATAACCAGCAGCTTGG                  | <i>Not</i> I            |
| SA2100.r2     | ATATGCGGCCGCTTAGTGAATGAAGTTATAACCAGCAGCTTGG               | <i>Not</i> I            |
| Pro-Atl.f     | ATATGGATCCGCTGAGACGACACAAGATCAAATAAAAAACG                 | <i>Bam</i> HI           |
| Pro-Atl.r1    | ATATGCGGCCGCGAGCGCTAAAAGTAGTTACTTTAGGTGTCGCTTCAGTTTTAGC   | <i>Not</i> I            |
| Pro-Atl.r2    | ATATGCGGCCGCTTAAGCGCTAAAAGTAGTTACTTTAGGTGTCGCTTCAGTTTTAGC | <i>Not</i> I            |
| IsdB.f        | ATATGGATCCGCAGCTGAAGAAACAGGTGGTACAAATAC                   | <i>Bam</i> HI           |
| IsdB.r1       | ATATGCGGCCGCTGATTTTTGCTTTATTTTCTTGTGTATTTTTATTG           | <i>Not</i> I            |
| IsdB.r2       | ATATGCGGCCGCTTATGATTTTTGCTTTATTTTCTTGTGTATTTTTATTG        | <i>Not</i> I            |

<sup>a</sup>Restriction sites underlined, stop codons in bold

Figure S1: MS/MS results to identify the phosphorylation site of purified (a-c) and TCA precipitated (d) His<sub>6</sub>-TEV-IsdB.

a

(K)KYMVMETTNDD<sup>y</sup>WKDFmVEGQR(V)

purified His<sub>6</sub>-TEV-IsdB

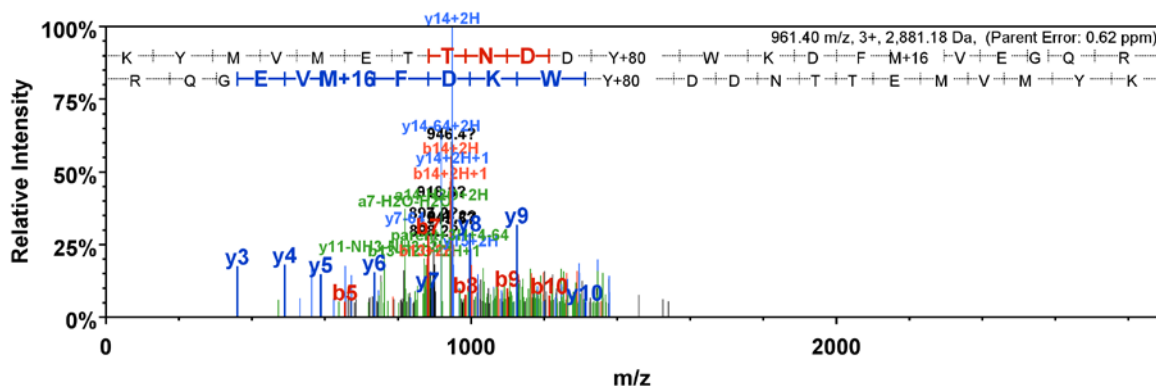

| B  | B Ions  | B+2H    | B-NH3   | B-H2O   | AA   | Y Ions  | Y+2H    | Y-NH3   | Y-H2O   | Y  |
|----|---------|---------|---------|---------|------|---------|---------|---------|---------|----|
| 1  | 129.1   | 65.1    | 112.1   |         | K    | 2,882.2 | 1,441.6 | 2,865.2 | 2,864.2 | 22 |
| 2  | 292.2   | 146.6   | 275.1   | 274.2   | Y    | 2,754.1 | 1,377.5 | 2,737.1 | 2,736.1 | 21 |
| 3  | 423.2   | 212.1   | 406.2   | 405.2   | M    | 2,591.0 | 1,296.0 | 2,574.0 | 2,573.0 | 20 |
| 4  | 522.3   | 261.6   | 505.2   | 504.3   | V    | 2,460.0 | 1,230.5 | 2,443.0 | 2,442.0 | 19 |
| 5  | 653.3   | 327.2   | 636.3   | 635.3   | M    | 2,360.9 | 1,181.0 | 2,343.9 | 2,342.9 | 18 |
| 6  | 782.4   | 391.7   | 765.3   | 764.3   | E    | 2,229.9 | 1,115.4 | 2,212.9 | 2,211.9 | 17 |
| 7  | 883.4   | 442.2   | 866.4   | 865.4   | T    | 2,100.8 | 1,050.9 | 2,083.8 | 2,082.8 | 16 |
| 8  | 984.5   | 492.7   | 967.4   | 966.4   | T    | 1,999.8 | 1,000.4 | 1,982.8 | 1,981.8 | 15 |
| 9  | 1,098.5 | 549.8   | 1,081.5 | 1,080.5 | N    | 1,898.7 | 949.9   | 1,881.7 | 1,880.7 | 14 |
| 10 | 1,213.5 | 607.3   | 1,196.5 | 1,195.5 | D    | 1,784.7 | 892.9   | 1,767.7 | 1,766.7 | 13 |
| 11 | 1,328.5 | 664.8   | 1,311.5 | 1,310.5 | D    | 1,669.7 | 835.3   | 1,652.6 | 1,651.7 | 12 |
| 12 | 1,571.6 | 786.3   | 1,554.6 | 1,553.6 | Y+80 | 1,554.6 | 777.8   | 1,537.6 | 1,536.6 | 11 |
| 13 | 1,757.7 | 879.3   | 1,740.6 | 1,739.6 | W    | 1,311.6 | 656.3   | 1,294.6 | 1,293.6 | 10 |
| 14 | 1,885.8 | 943.4   | 1,868.7 | 1,867.7 | K    | 1,125.5 | 563.3   | 1,108.5 | 1,107.5 | 9  |
| 15 | 2,000.8 | 1,000.9 | 1,983.8 | 1,982.8 | D    | 997.4   | 499.2   | 980.4   | 979.4   | 8  |
| 16 | 2,147.8 | 1,074.4 | 2,130.8 | 2,129.8 | F    | 882.4   | 441.7   | 865.4   | 864.4   | 7  |
| 17 | 2,294.9 | 1,147.9 | 2,277.9 | 2,276.9 | M+16 | 735.3   | 368.2   | 718.3   | 717.3   | 6  |
| 18 | 2,394.0 | 1,197.5 | 2,376.9 | 2,375.9 | V    | 588.3   | 294.7   | 571.3   | 570.3   | 5  |
| 19 | 2,523.0 | 1,262.0 | 2,506.0 | 2,505.0 | E    | 489.2   | 245.1   | 472.2   | 471.2   | 4  |
| 20 | 2,580.0 | 1,290.5 | 2,563.0 | 2,562.0 | G    | 360.2   | 180.6   | 343.2   | 342.2   | 3  |
| 21 | 2,708.1 | 1,354.5 | 2,691.0 | 2,690.1 | Q    | 303.2   | 152.1   | 286.2   | 285.2   | 2  |
| 22 | 2,882.2 | 1,441.6 | 2,865.2 | 2,864.2 | R    | 175.1   | 88.1    | 158.1   |         | 1  |

| Xcorr | DCn   | Actual peptide mass (AMU) | Spectrum charge | Δmass (PPM) |
|-------|-------|---------------------------|-----------------|-------------|
| 4.05  | 0.354 | 2,881.18                  | 3               | 0.62        |

b

(K)KYMVMETTND<sup>y</sup>WKDFmVEGQR(V)purified His<sub>6</sub>-TEV-IsdB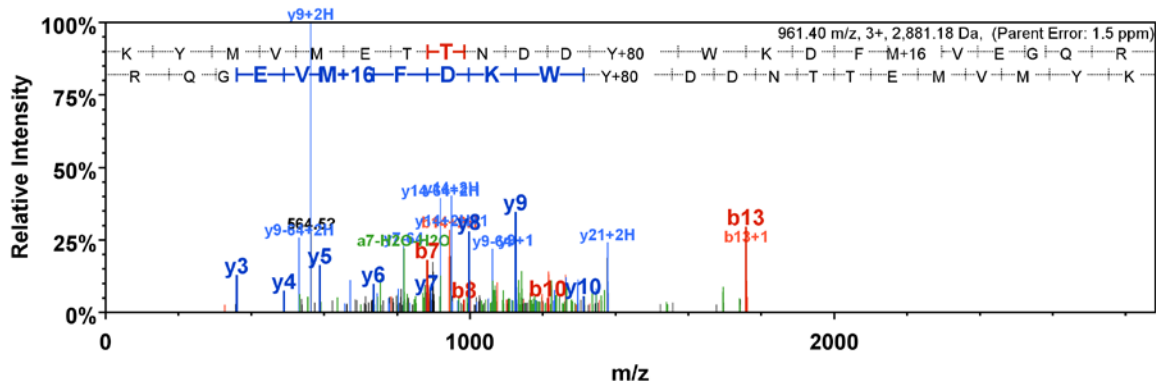

| B  | B Ions  | B+2H    | B-NH3   | B-H2O   | AA   | Y Ions  | Y+2H    | Y-NH3   | Y-H2O   | Y  |
|----|---------|---------|---------|---------|------|---------|---------|---------|---------|----|
| 1  | 129.1   | 65.1    | 112.1   |         | K    | 2,882.2 | 1,441.6 | 2,865.2 | 2,864.2 | 22 |
| 2  | 292.2   | 146.6   | 275.1   | 274.2   | Y    | 2,754.1 | 1,377.5 | 2,737.1 | 2,736.1 | 21 |
| 3  | 423.2   | 212.1   | 406.2   | 405.2   | M    | 2,591.0 | 1,296.0 | 2,574.0 | 2,573.0 | 20 |
| 4  | 522.3   | 261.6   | 505.2   | 504.3   | V    | 2,460.0 | 1,230.5 | 2,443.0 | 2,442.0 | 19 |
| 5  | 653.3   | 327.2   | 636.3   | 635.3   | M    | 2,360.9 | 1,181.0 | 2,343.9 | 2,342.9 | 18 |
| 6  | 782.4   | 391.7   | 765.3   | 764.3   | E    | 2,229.9 | 1,115.4 | 2,212.9 | 2,211.9 | 17 |
| 7  | 883.4   | 442.2   | 866.4   | 865.4   | T    | 2,100.8 | 1,050.9 | 2,083.8 | 2,082.8 | 16 |
| 8  | 984.5   | 492.7   | 967.4   | 966.4   | T    | 1,999.8 | 1,000.4 | 1,982.8 | 1,981.8 | 15 |
| 9  | 1,098.5 | 549.8   | 1,081.5 | 1,080.5 | N    | 1,898.7 | 949.9   | 1,881.7 | 1,880.7 | 14 |
| 10 | 1,213.5 | 607.3   | 1,196.5 | 1,195.5 | D    | 1,784.7 | 892.9   | 1,767.7 | 1,766.7 | 13 |
| 11 | 1,328.5 | 664.8   | 1,311.5 | 1,310.5 | D    | 1,669.7 | 835.3   | 1,652.6 | 1,651.7 | 12 |
| 12 | 1,571.6 | 786.3   | 1,554.6 | 1,553.6 | Y+80 | 1,554.6 | 777.8   | 1,537.6 | 1,536.6 | 11 |
| 13 | 1,757.7 | 879.3   | 1,740.6 | 1,739.6 | W    | 1,311.6 | 656.3   | 1,294.6 | 1,293.6 | 10 |
| 14 | 1,885.8 | 943.4   | 1,868.7 | 1,867.7 | K    | 1,125.5 | 563.3   | 1,108.5 | 1,107.5 | 9  |
| 15 | 2,000.8 | 1,000.9 | 1,983.8 | 1,982.8 | D    | 997.4   | 499.2   | 980.4   | 979.4   | 8  |
| 16 | 2,147.8 | 1,074.4 | 2,130.8 | 2,129.8 | F    | 882.4   | 441.7   | 865.4   | 864.4   | 7  |
| 17 | 2,294.9 | 1,147.9 | 2,277.9 | 2,276.9 | M+16 | 735.3   | 368.2   | 718.3   | 717.3   | 6  |
| 18 | 2,394.0 | 1,197.5 | 2,376.9 | 2,375.9 | V    | 588.3   | 294.7   | 571.3   | 570.3   | 5  |
| 19 | 2,523.0 | 1,262.0 | 2,506.0 | 2,505.0 | E    | 489.2   | 245.1   | 472.2   | 471.2   | 4  |
| 20 | 2,580.0 | 1,290.5 | 2,563.0 | 2,562.0 | G    | 360.2   | 180.6   | 343.2   | 342.2   | 3  |
| 21 | 2,708.1 | 1,354.5 | 2,691.0 | 2,690.1 | Q    | 303.2   | 152.1   | 286.2   | 285.2   | 2  |
| 22 | 2,882.2 | 1,441.6 | 2,865.2 | 2,864.2 | R    | 175.1   | 88.1    | 158.1   |         | 1  |

| Xcorr | DCn   | Actual peptide mass (AMU) | Spectrum charge | Δmass (PPM) |
|-------|-------|---------------------------|-----------------|-------------|
| 3.66  | 0.434 | 2,881.18                  | 3               | 1.5         |

C

(K)KYMVMETTND<sup>y</sup>WKDFmVEGQR(V)

purified His<sub>6</sub>-TEV-IsoB

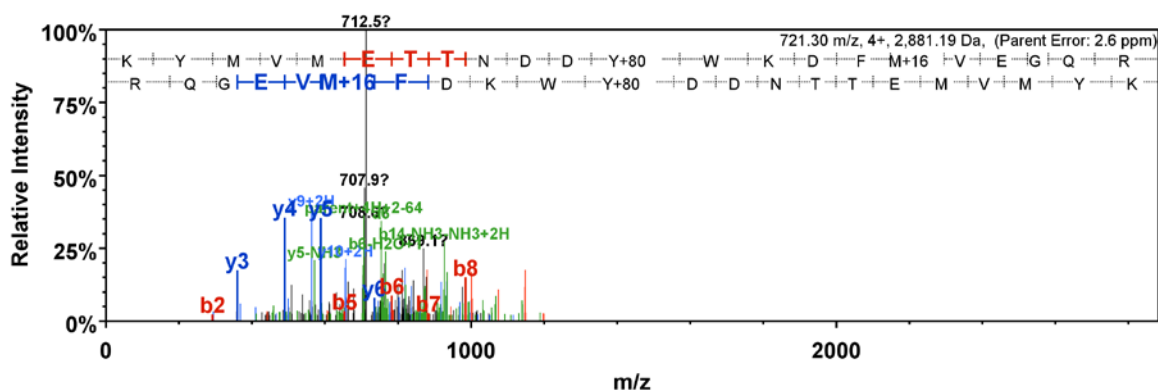

| B  | B Ions  | B+2H    | B-NH3   | B-H2O   | AA   | Y Ions  | Y+2H    | Y-NH3   | Y-H2O   | Y  |
|----|---------|---------|---------|---------|------|---------|---------|---------|---------|----|
| 1  | 129.1   | 65.1    | 112.1   |         | K    | 2,882.2 | 1,441.6 | 2,865.2 | 2,864.2 | 22 |
| 2  | 292.2   | 146.6   | 275.1   | 274.2   | Y    | 2,754.1 | 1,377.5 | 2,737.1 | 2,736.1 | 21 |
| 3  | 423.2   | 212.1   | 406.2   | 405.2   | M    | 2,591.0 | 1,296.0 | 2,574.0 | 2,573.0 | 20 |
| 4  | 522.3   | 261.6   | 505.2   | 504.3   | V    | 2,460.0 | 1,230.5 | 2,443.0 | 2,442.0 | 19 |
| 5  | 653.3   | 327.2   | 636.3   | 635.3   | M    | 2,360.9 | 1,181.0 | 2,343.9 | 2,342.9 | 18 |
| 6  | 782.4   | 391.7   | 765.3   | 764.3   | E    | 2,229.9 | 1,115.4 | 2,212.9 | 2,211.9 | 17 |
| 7  | 883.4   | 442.2   | 866.4   | 865.4   | T    | 2,100.8 | 1,050.9 | 2,083.8 | 2,082.8 | 16 |
| 8  | 984.5   | 492.7   | 967.4   | 966.4   | T    | 1,999.8 | 1,000.4 | 1,982.8 | 1,981.8 | 15 |
| 9  | 1,098.5 | 549.8   | 1,081.5 | 1,080.5 | N    | 1,898.7 | 949.9   | 1,881.7 | 1,880.7 | 14 |
| 10 | 1,213.5 | 607.3   | 1,196.5 | 1,195.5 | D    | 1,784.7 | 892.9   | 1,767.7 | 1,766.7 | 13 |
| 11 | 1,328.5 | 664.8   | 1,311.5 | 1,310.5 | D    | 1,669.7 | 835.3   | 1,652.6 | 1,651.7 | 12 |
| 12 | 1,571.6 | 786.3   | 1,554.6 | 1,553.6 | Y+80 | 1,554.6 | 777.8   | 1,537.6 | 1,536.6 | 11 |
| 13 | 1,757.7 | 879.3   | 1,740.6 | 1,739.6 | W    | 1,311.6 | 656.3   | 1,294.6 | 1,293.6 | 10 |
| 14 | 1,885.8 | 943.4   | 1,868.7 | 1,867.7 | K    | 1,125.5 | 563.3   | 1,108.5 | 1,107.5 | 9  |
| 15 | 2,000.8 | 1,000.9 | 1,983.8 | 1,982.8 | D    | 997.4   | 499.2   | 980.4   | 979.4   | 8  |
| 16 | 2,147.8 | 1,074.4 | 2,130.8 | 2,129.8 | F    | 882.4   | 441.7   | 865.4   | 864.4   | 7  |
| 17 | 2,294.9 | 1,147.9 | 2,277.9 | 2,276.9 | M+16 | 735.3   | 368.2   | 718.3   | 717.3   | 6  |
| 18 | 2,394.0 | 1,197.5 | 2,376.9 | 2,375.9 | V    | 588.3   | 294.7   | 571.3   | 570.3   | 5  |
| 19 | 2,523.0 | 1,262.0 | 2,506.0 | 2,505.0 | E    | 489.2   | 245.1   | 472.2   | 471.2   | 4  |
| 20 | 2,580.0 | 1,290.5 | 2,563.0 | 2,562.0 | G    | 360.2   | 180.6   | 343.2   | 342.2   | 3  |
| 21 | 2,708.1 | 1,354.5 | 2,691.0 | 2,690.1 | Q    | 303.2   | 152.1   | 286.2   | 285.2   | 2  |
| 22 | 2,882.2 | 1,441.6 | 2,865.2 | 2,864.2 | R    | 175.1   | 88.1    | 158.1   |         | 1  |

| Xcorr | DCn   | Actual peptide mass (AMU) | Spectrum charge | Δmass (PPM) |
|-------|-------|---------------------------|-----------------|-------------|
| 3.55  | 0.223 | 2,881.19                  | 4               | 2.6         |

d

(K)KYMVMETTND<sup>y</sup>WKDFmVEGQR(V)

TCA-precipitated His<sub>6</sub>-TEV-IsdB

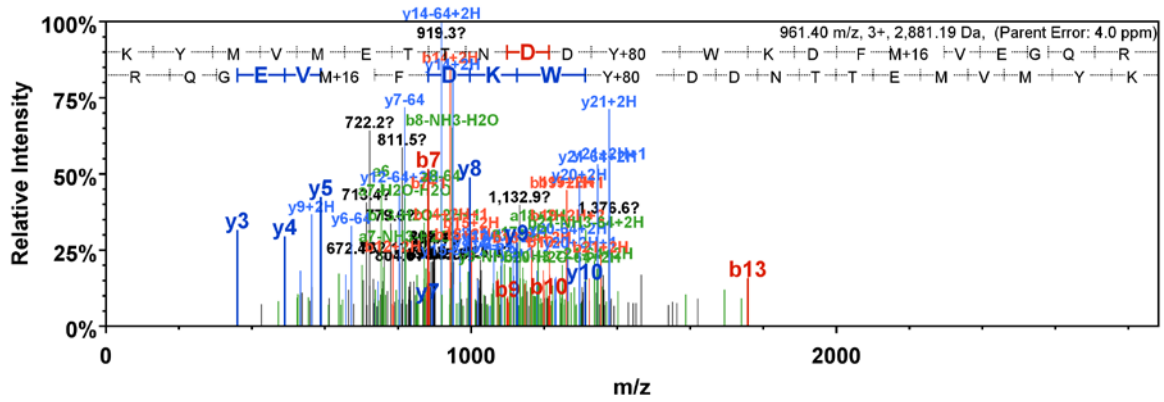

| B  | B Ions  | B+2H    | B-NH3   | B-H2O   | AA   | Y Ions  | Y+2H    | Y-NH3   | Y-H2O   | Y  |
|----|---------|---------|---------|---------|------|---------|---------|---------|---------|----|
| 1  | 129.1   | 65.1    | 112.1   |         | K    | 2,882.2 | 1,441.6 | 2,865.2 | 2,864.2 | 22 |
| 2  | 292.2   | 146.6   | 275.1   | 274.2   | Y    | 2,754.1 | 1,377.5 | 2,737.1 | 2,736.1 | 21 |
| 3  | 423.2   | 212.1   | 406.2   | 405.2   | M    | 2,591.0 | 1,296.0 | 2,574.0 | 2,573.0 | 20 |
| 4  | 522.3   | 261.6   | 505.2   | 504.3   | V    | 2,460.0 | 1,230.5 | 2,443.0 | 2,442.0 | 19 |
| 5  | 653.3   | 327.2   | 636.3   | 635.3   | M    | 2,360.9 | 1,181.0 | 2,343.9 | 2,342.9 | 18 |
| 6  | 782.4   | 391.7   | 765.3   | 764.3   | E    | 2,229.9 | 1,115.4 | 2,212.9 | 2,211.9 | 17 |
| 7  | 883.4   | 442.2   | 866.4   | 865.4   | T    | 2,100.8 | 1,050.9 | 2,083.8 | 2,082.8 | 16 |
| 8  | 984.5   | 492.7   | 967.4   | 966.4   | T    | 1,999.8 | 1,000.4 | 1,982.8 | 1,981.8 | 15 |
| 9  | 1,098.5 | 549.8   | 1,081.5 | 1,080.5 | N    | 1,898.7 | 949.9   | 1,881.7 | 1,880.7 | 14 |
| 10 | 1,213.5 | 607.3   | 1,196.5 | 1,195.5 | D    | 1,784.7 | 892.9   | 1,767.7 | 1,766.7 | 13 |
| 11 | 1,328.5 | 664.8   | 1,311.5 | 1,310.5 | D    | 1,669.7 | 835.3   | 1,652.6 | 1,651.7 | 12 |
| 12 | 1,571.6 | 786.3   | 1,554.6 | 1,553.6 | Y+80 | 1,554.6 | 777.8   | 1,537.6 | 1,536.6 | 11 |
| 13 | 1,757.7 | 879.3   | 1,740.6 | 1,739.6 | W    | 1,311.6 | 656.3   | 1,294.6 | 1,293.6 | 10 |
| 14 | 1,885.8 | 943.4   | 1,868.7 | 1,867.7 | K    | 1,125.5 | 563.3   | 1,108.5 | 1,107.5 | 9  |
| 15 | 2,000.8 | 1,000.9 | 1,983.8 | 1,982.8 | D    | 997.4   | 499.2   | 980.4   | 979.4   | 8  |
| 16 | 2,147.8 | 1,074.4 | 2,130.8 | 2,129.8 | F    | 882.4   | 441.7   | 865.4   | 864.4   | 7  |
| 17 | 2,294.9 | 1,147.9 | 2,277.9 | 2,276.9 | M+16 | 735.3   | 368.2   | 718.3   | 717.3   | 6  |
| 18 | 2,394.0 | 1,197.5 | 2,376.9 | 2,375.9 | V    | 588.3   | 294.7   | 571.3   | 570.3   | 5  |
| 19 | 2,523.0 | 1,262.0 | 2,506.0 | 2,505.0 | E    | 489.2   | 245.1   | 472.2   | 471.2   | 4  |
| 20 | 2,580.0 | 1,290.5 | 2,563.0 | 2,562.0 | G    | 360.2   | 180.6   | 343.2   | 342.2   | 3  |
| 21 | 2,708.1 | 1,354.5 | 2,691.0 | 2,690.1 | Q    | 303.2   | 152.1   | 286.2   | 285.2   | 2  |
| 22 | 2,882.2 | 1,441.6 | 2,865.2 | 2,864.2 | R    | 175.1   | 88.1    | 158.1   |         | 1  |

| Xcorr | DCn   | Actual peptide mass (AMU) | Spectrum charge | Δmass (PPM) |
|-------|-------|---------------------------|-----------------|-------------|
| 3.87  | 0.543 | 2,881.19                  | 3               | 4           |
